# Supplementary material for: The Effect of Aflibercept and Arsenic Trioxide on the Proliferation, Migration and Apoptosis of Oral Squamous Cell Carcinoma in Vitro
Source: Research Square preprint supplement (doi:10.21203/rs.3.rs-179169/v1), 2021-02-08
Supplement: Supplementary file 1 [file 3c53e12bffa007078abaf1f4.docx]

| Cell name | Accession cell  number | Gender | Age | location | Pathologic diagnosis | T | Lymph node involvement |
| --- | --- | --- | --- | --- | --- | --- | --- |
| OCC-11 | IBRC C10987 | Male | 77 | tongue | Well differentiated squamous cell carcinoma | T1 | N0 |
| OCC-18 | IBRC C10995 | Male | 41 | Lower lip | Well differentiated squamous cell carcinoma | T2 | N0 |
| OCC-20 | IBRC C10997 | Female | 75 | tongue | Moderately differentiated squamous cell carcinoma | T2 | N0 |
